# Supplementary material for: Heritable temporal gene expression patterns correlate with metabolomic seed content in developing hexaploid oat seed
Source: bioRxiv or medRxiv preprint supplement (doi:10.1101/709774), 2019-10-29
Supplement: Supplementary file [file media-1.pdf]

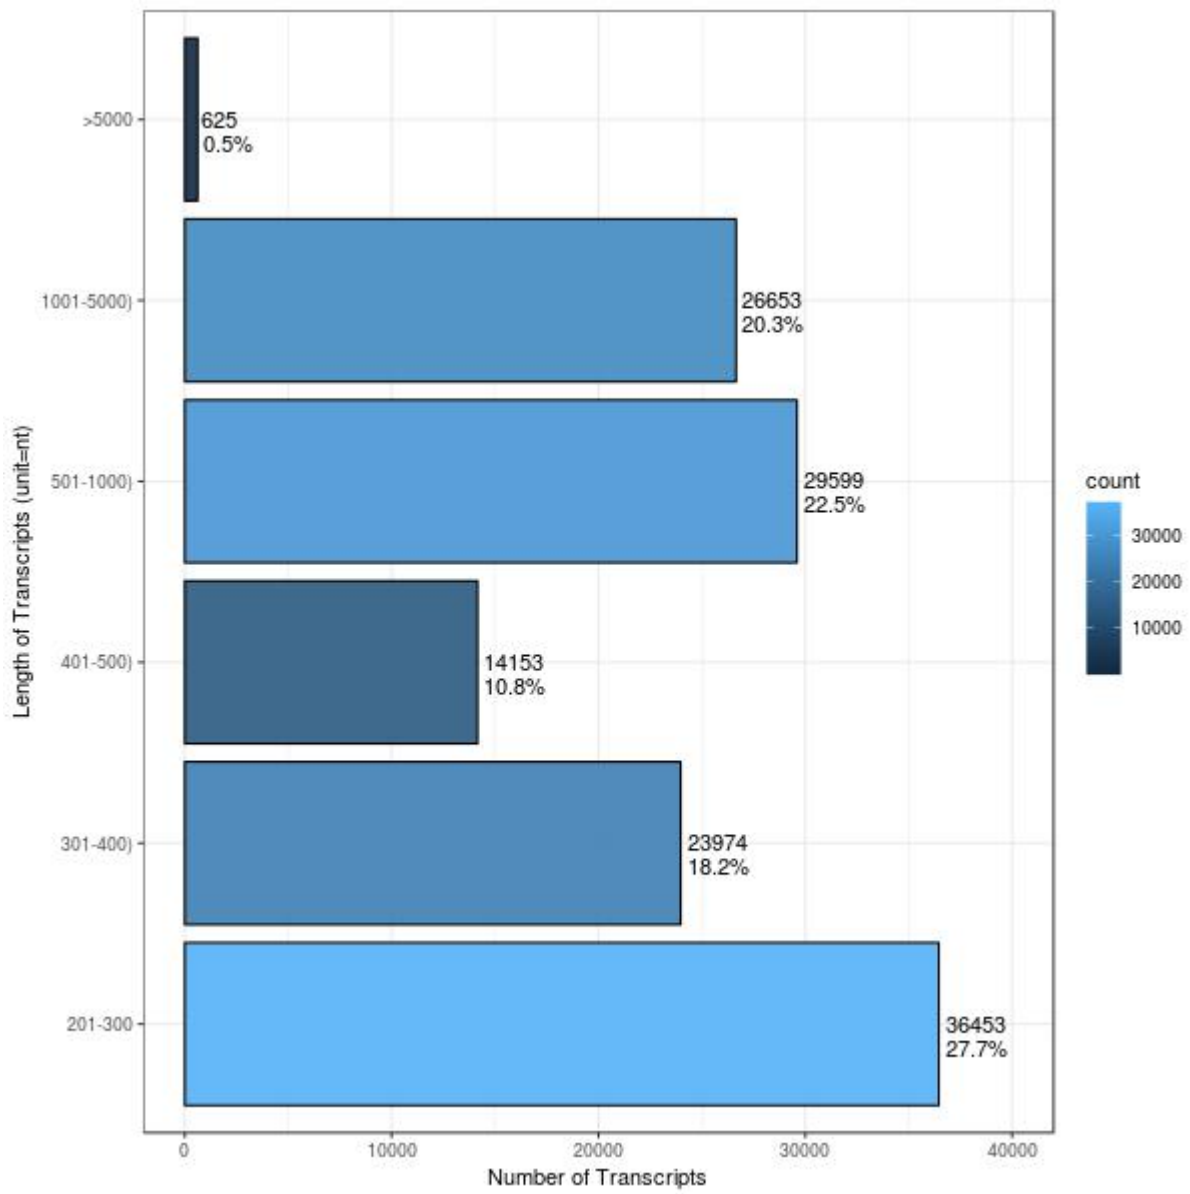

1  
 2 **Figure S1** Transcript length distribution of the 131,457 transcripts included in the RTA  
 3

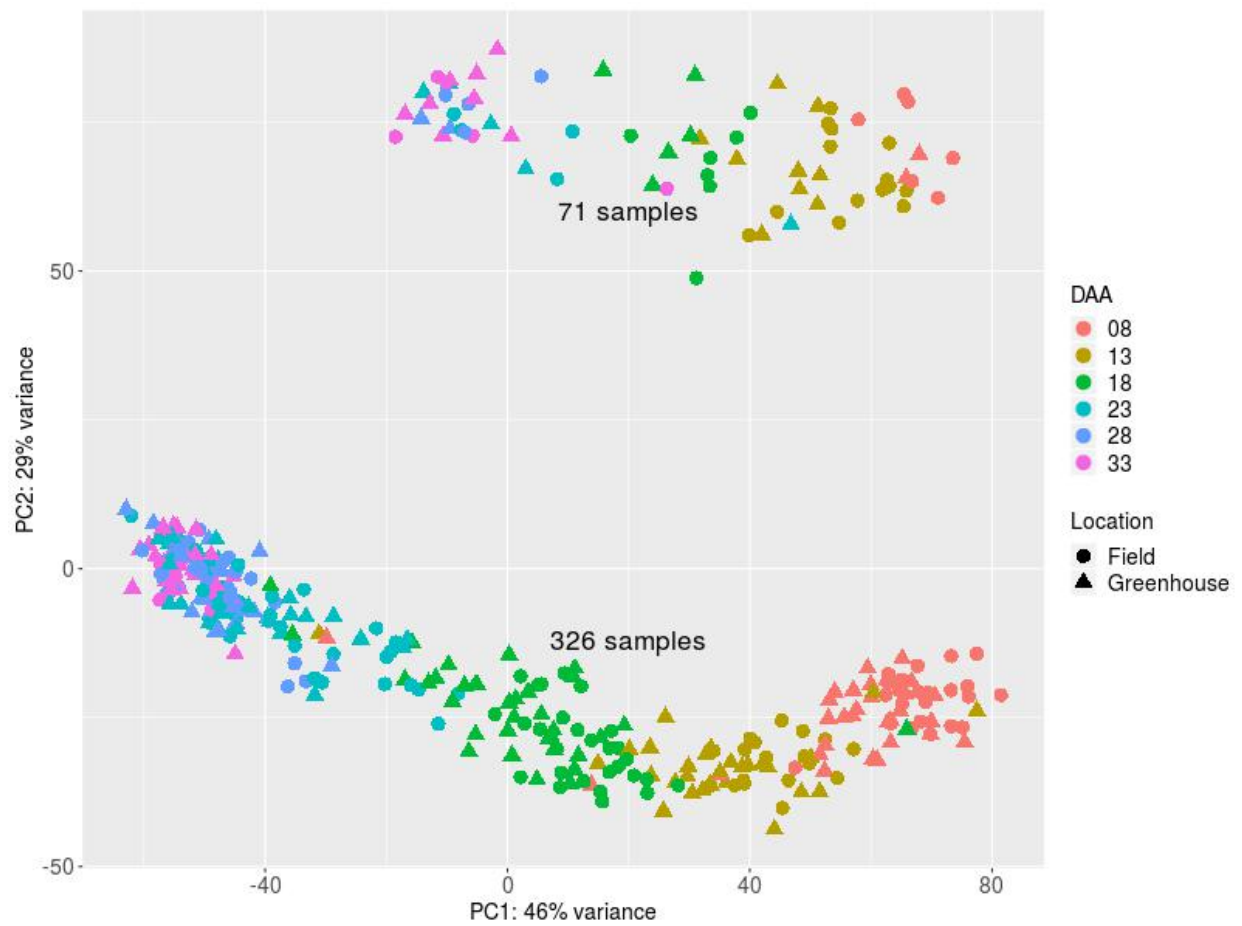

4  
 5 **Figure S2** PCA plot of 397 samples with more than 0.5 million mapped reads based on the 500  
 6 transcripts with highest variance.  
 7

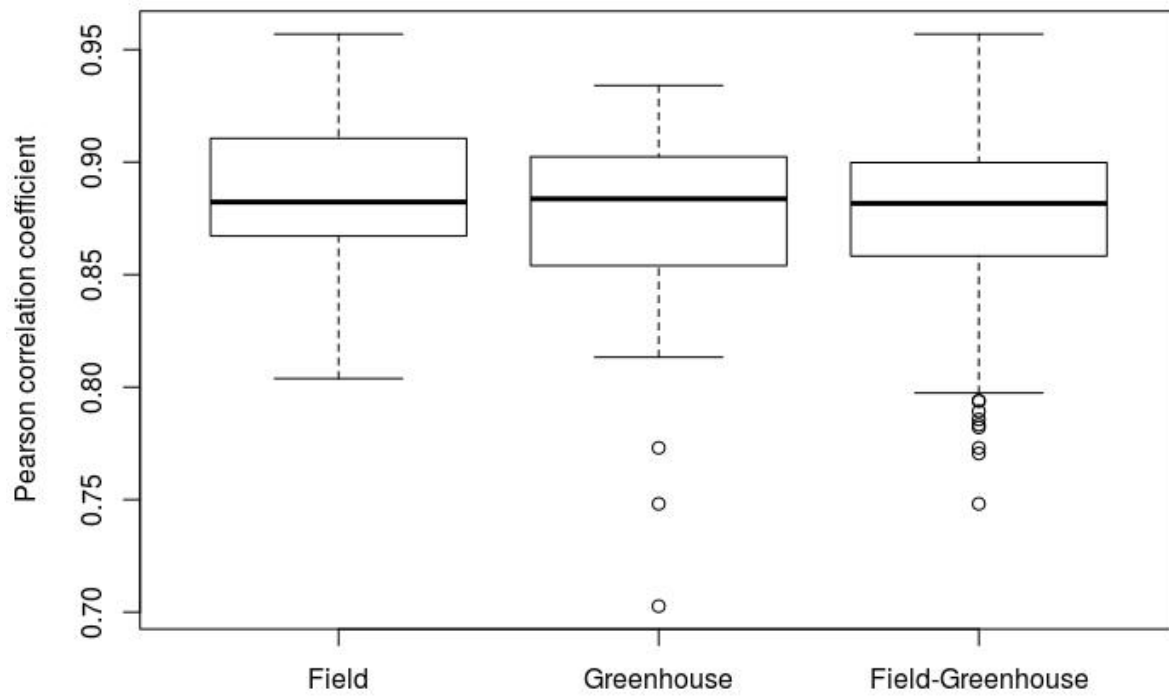

8  
9 **Figure S3** Distribution of Pearson correlation coefficients of biological replicates from  
10 Greenhouse samples, Field samples and among samples across the two sites

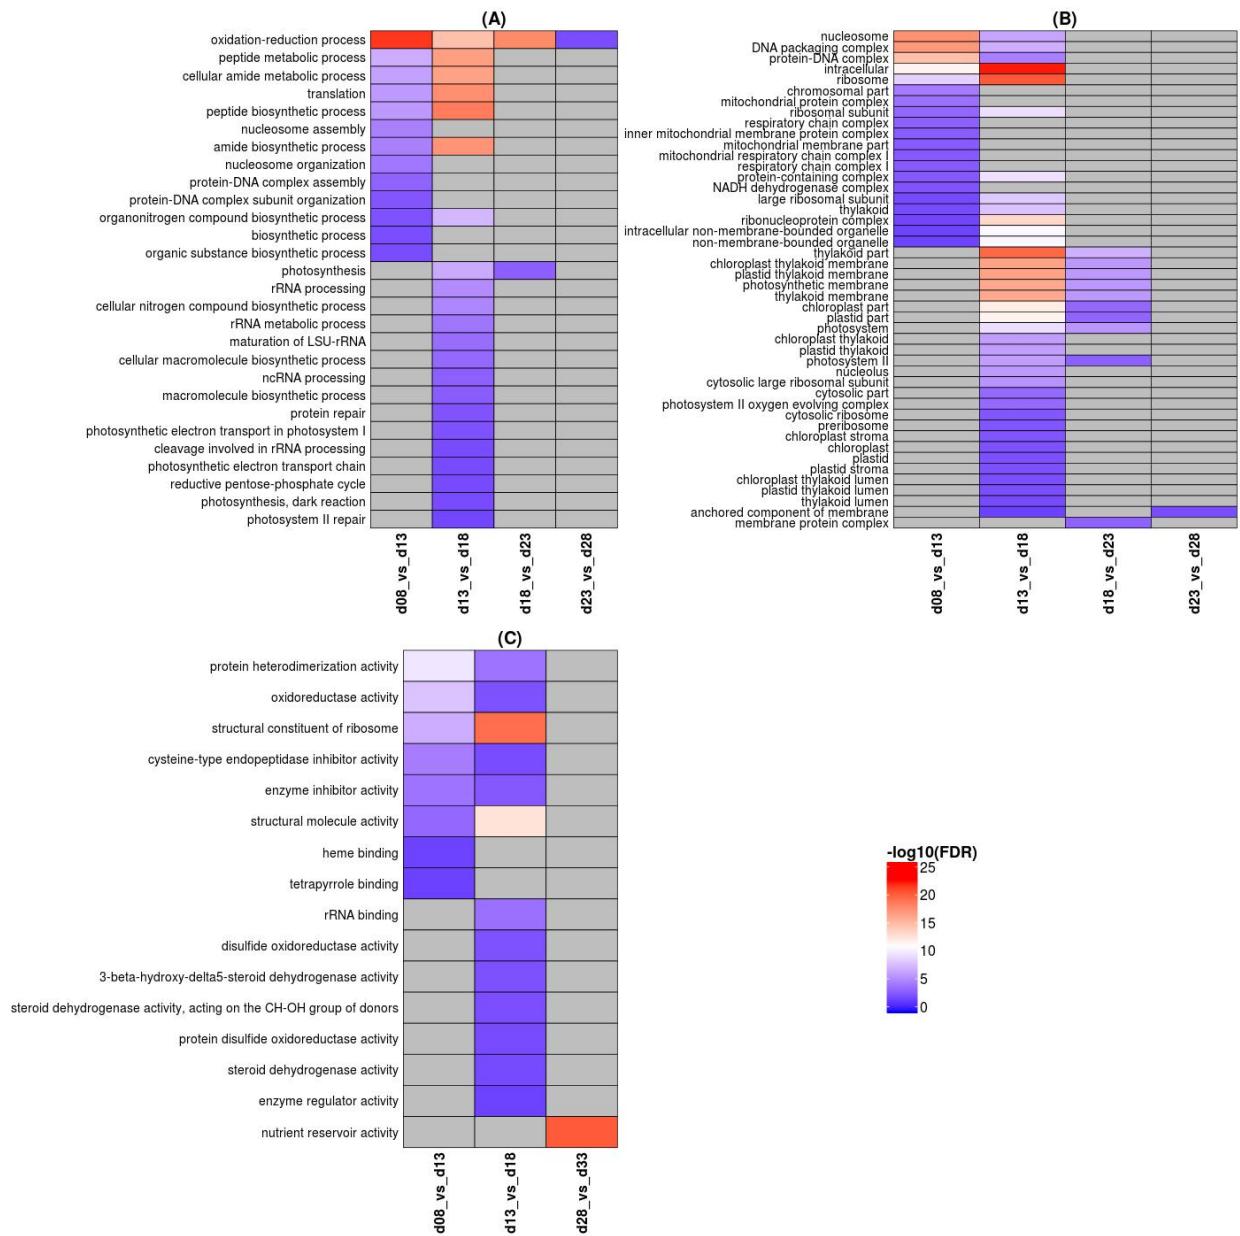

11  
 12 **Figure S4** Biological process (A), cellular compartments (B) and molecular function (C) GO  
 13 terms enriched for differentially expressed transcript sets between adjacent time points. FDR  
 14 adjusted p-values < 0.01 (in -log<sub>10</sub> scale) were colored between blue and red, and cells without  
 15 GO terms assigned were colored in gray.  
 16

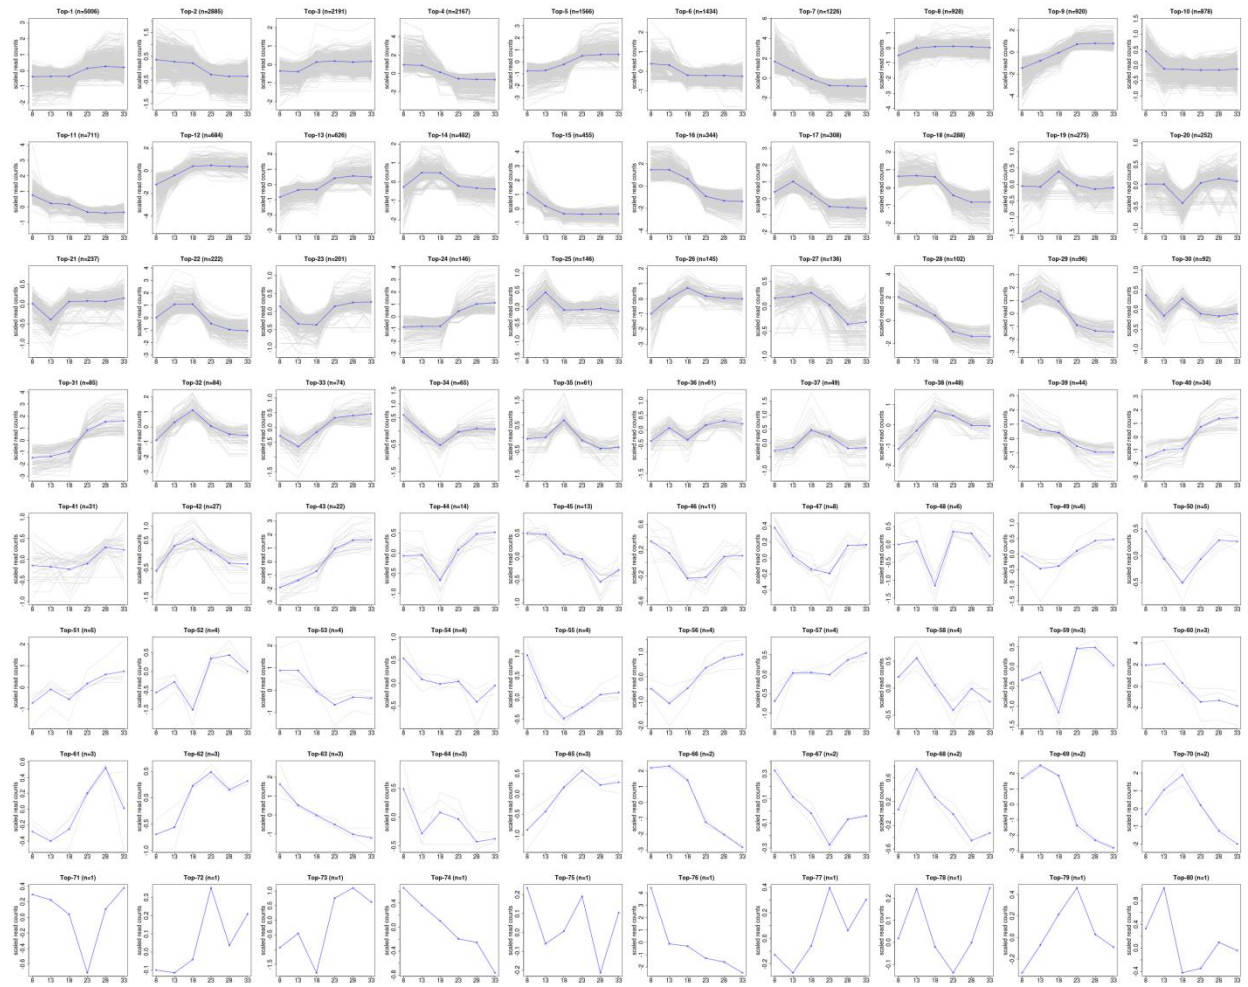

17  
 18 **Figure S5** The 80 observed temporal transcript expression patterns identified from 25,971  
 19 differentially expressed transcripts between five pairs of adjacent time points  
 20

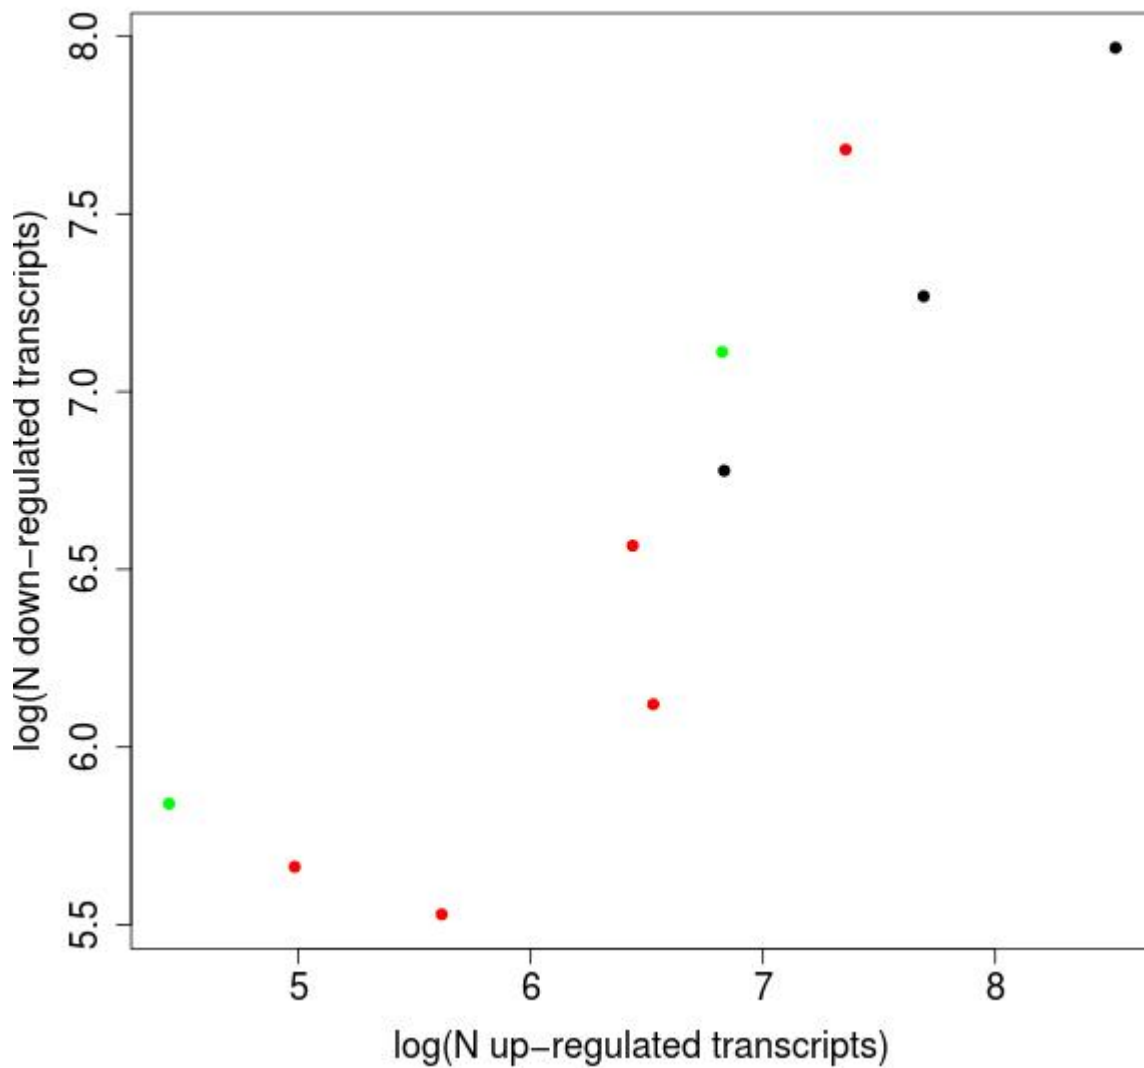

21  
 22 **Figure S6** Correlation of transcript numbers (log scale) between each pair of symmetrical up-  
 23 and down-regulated expression patterns. Each point represents a pair of symmetrical up- and  
 24 down-regulated expression patterns. The number of transcripts in the up-regulated pattern on  
 25 the x-axis and the number of transcript in the down-regulated pattern on the y-axis. Black points  
 26 have one differential expression event, red points two, and green points three such events.  
 27

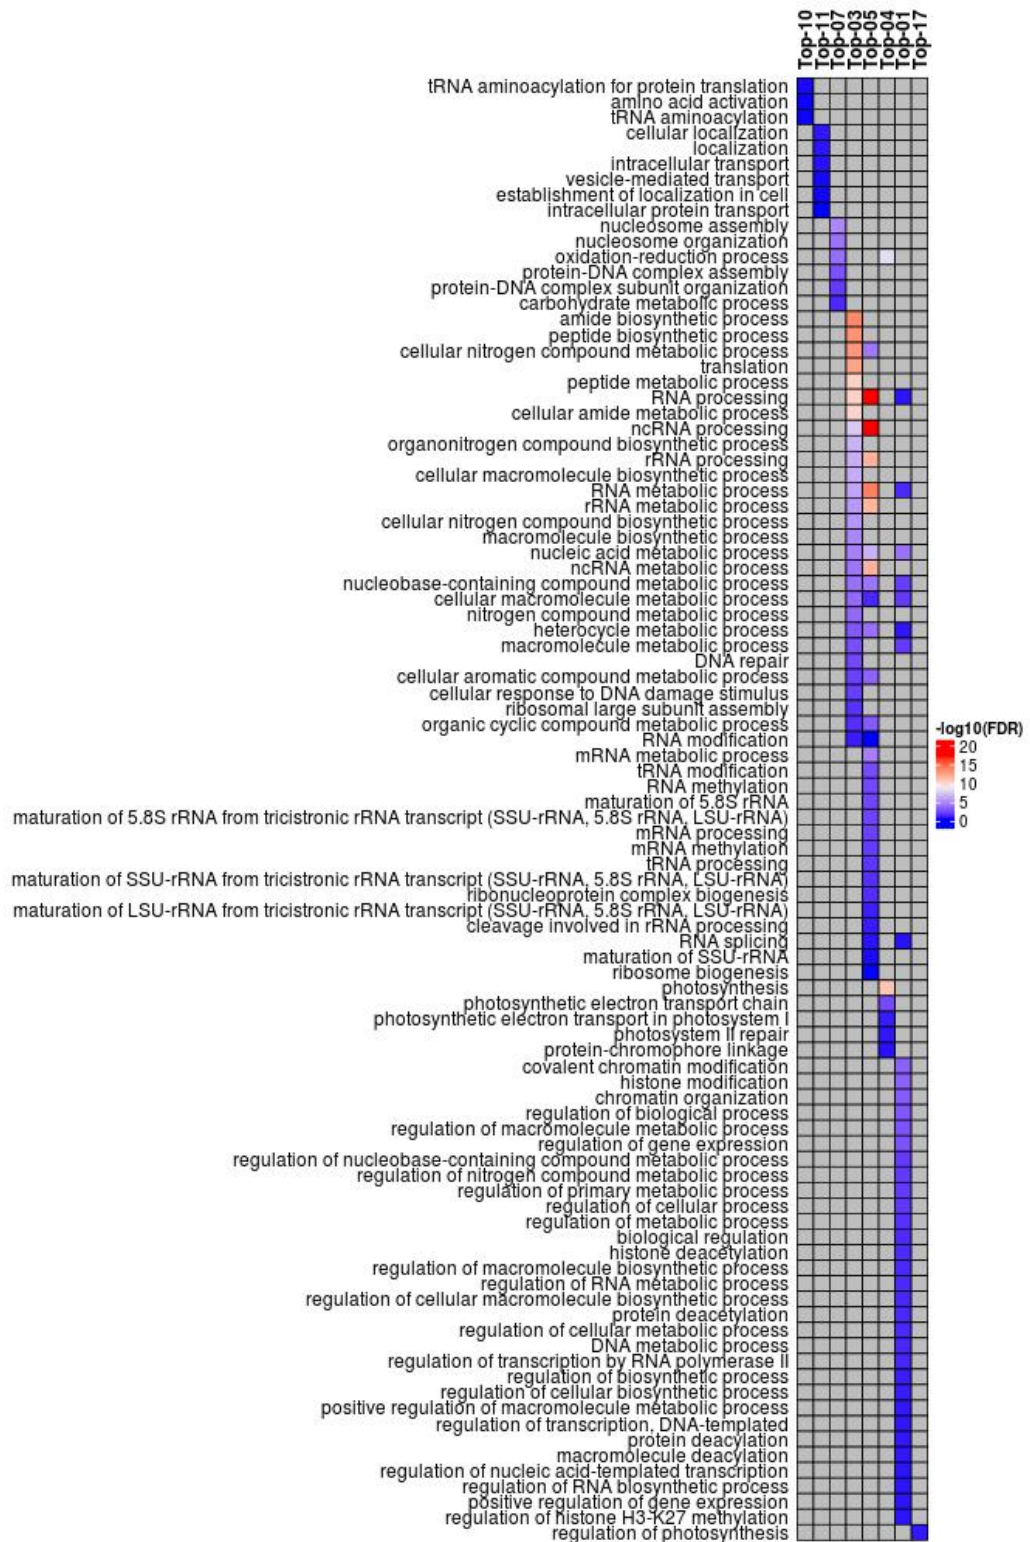

28  
 29 **Figure S7** GO categories enriched for 8 temporal transcript co-expression sets. FDR adjusted  
 30 p-values < 0.01 (in  $-\log_{10}$  scale) were colored between blue and red, and cells without GO  
 31 terms assigned were colored in gray.  
 32

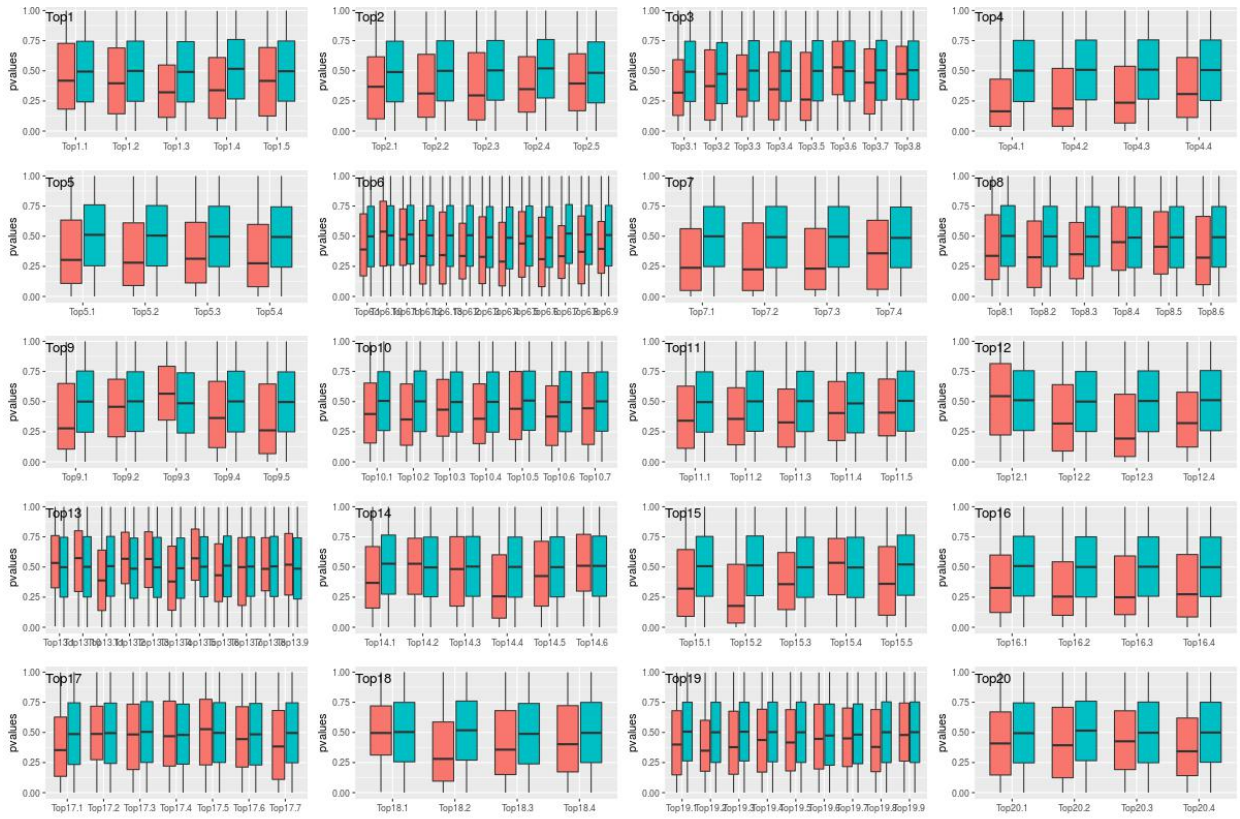

33

34 **Figure S8** Distribution of P values of simple linear regression between 634 metabolites and PC1  
 35 scores of GCoE sets. Red boxes contained p-values from real data, and blue boxes contained  
 36 p-values from 100 permutations.



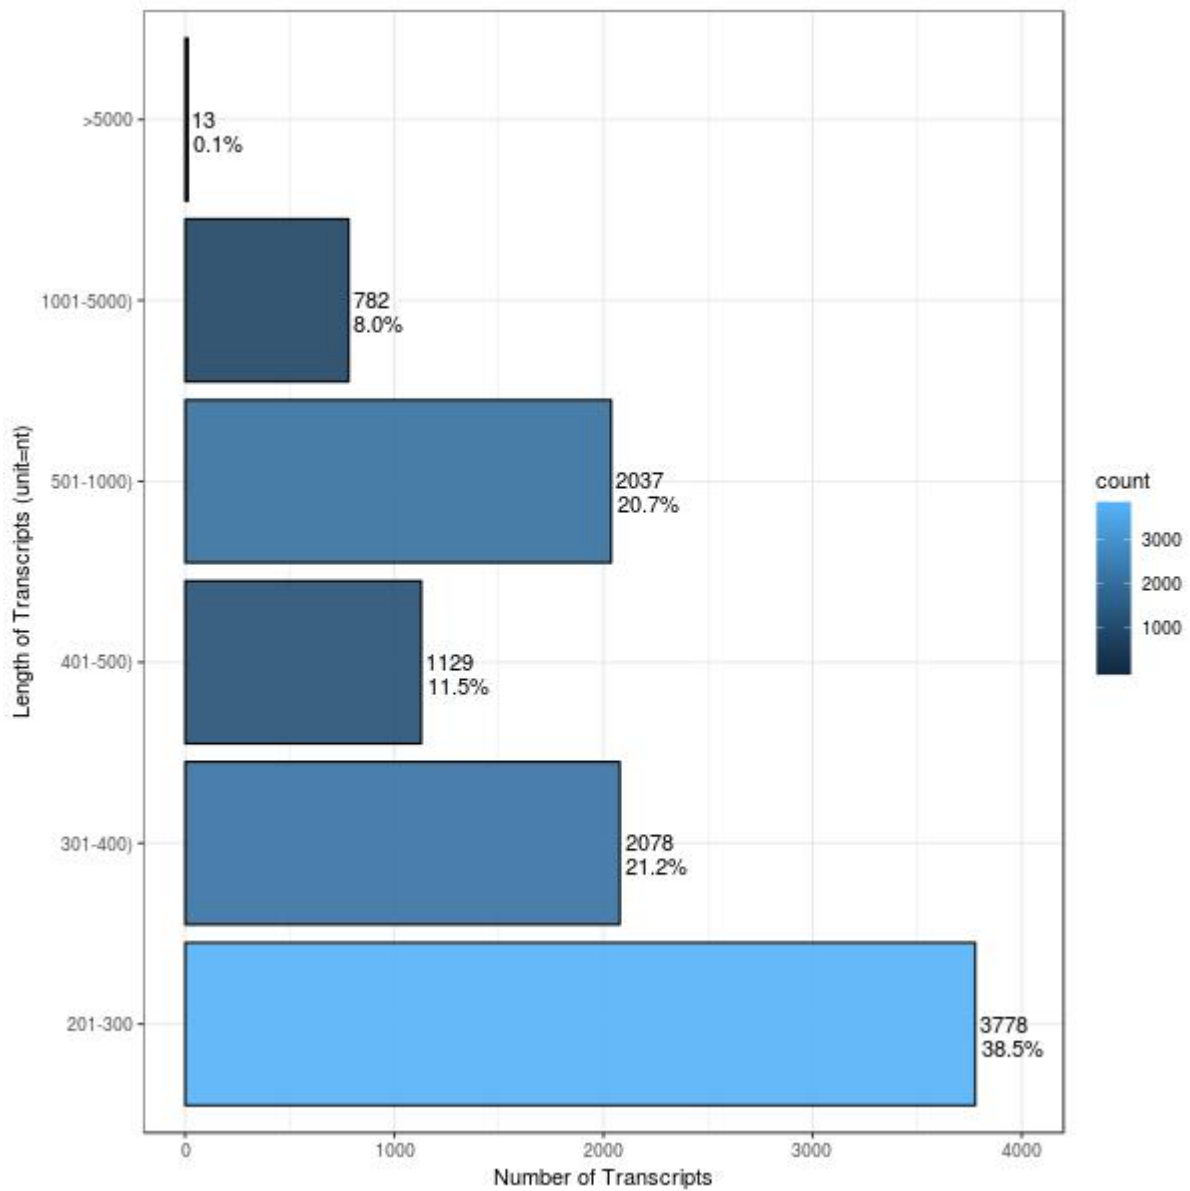

37

38 **Figure S9** Transcript length distribution of the 9,817 transcripts that couldn't be aligned to the  
 39 UniRef100

40

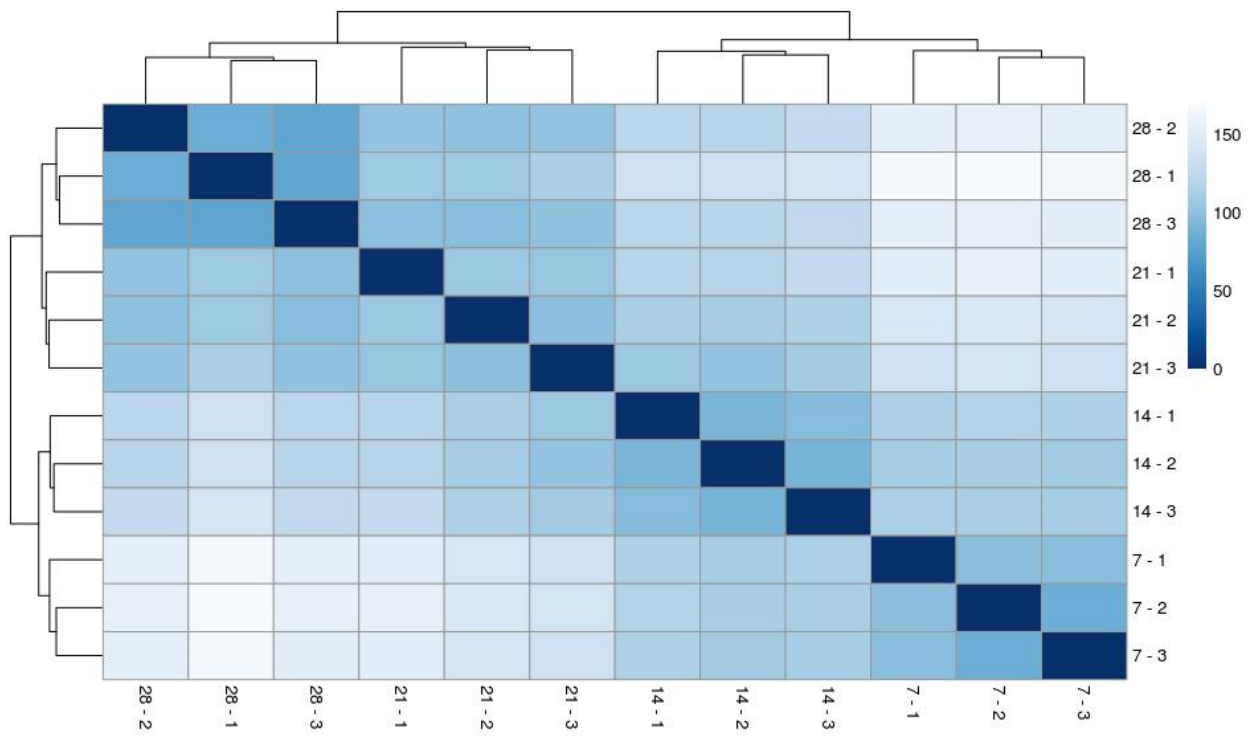

41

42 **Figure S10** clusters of 12 HiSeq samples based on expression profiles. Euclidean distances  
 43 between samples were colored between dark blue and light blue.

44

45

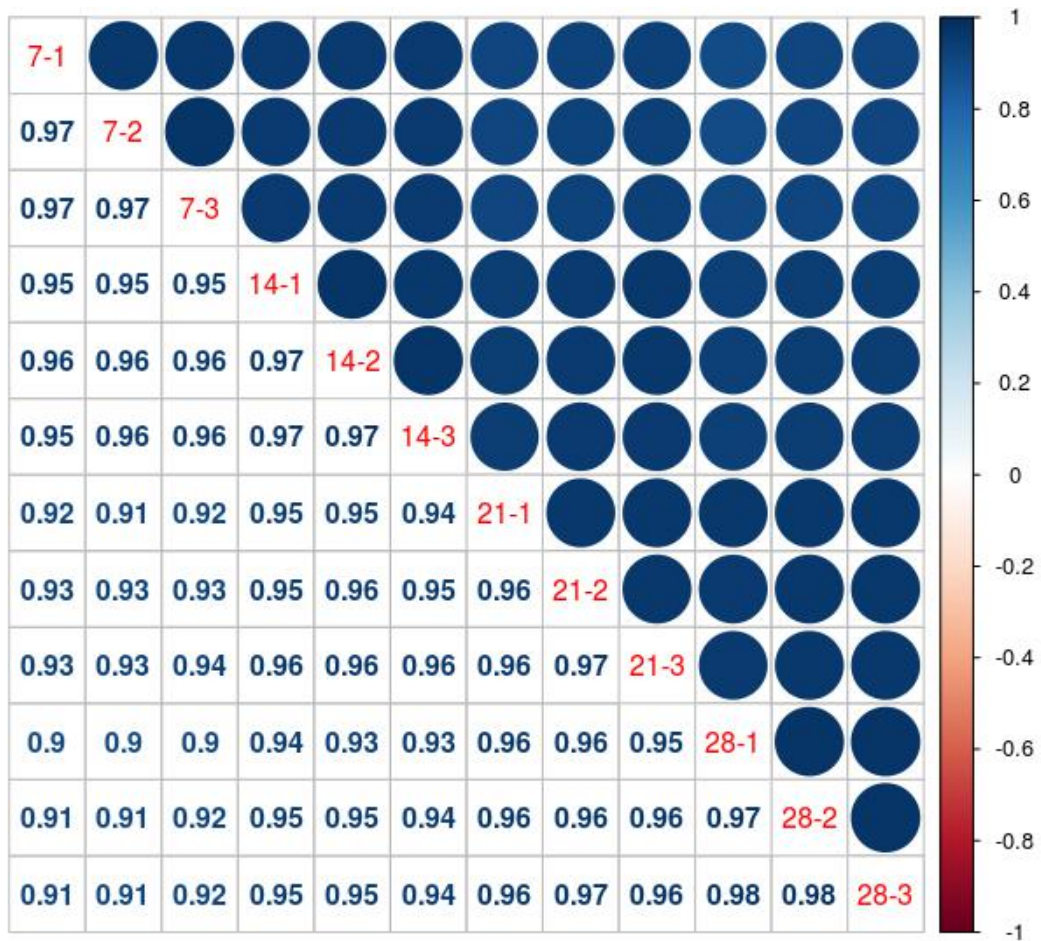

46  
47  
48  
49

**Figure S11** Pearson correlation coefficients of biological replicates from 12 HiSeq samples of cv.Ogle-C whose developing seeds were collected at 7, 14, 21, and 28 DAA

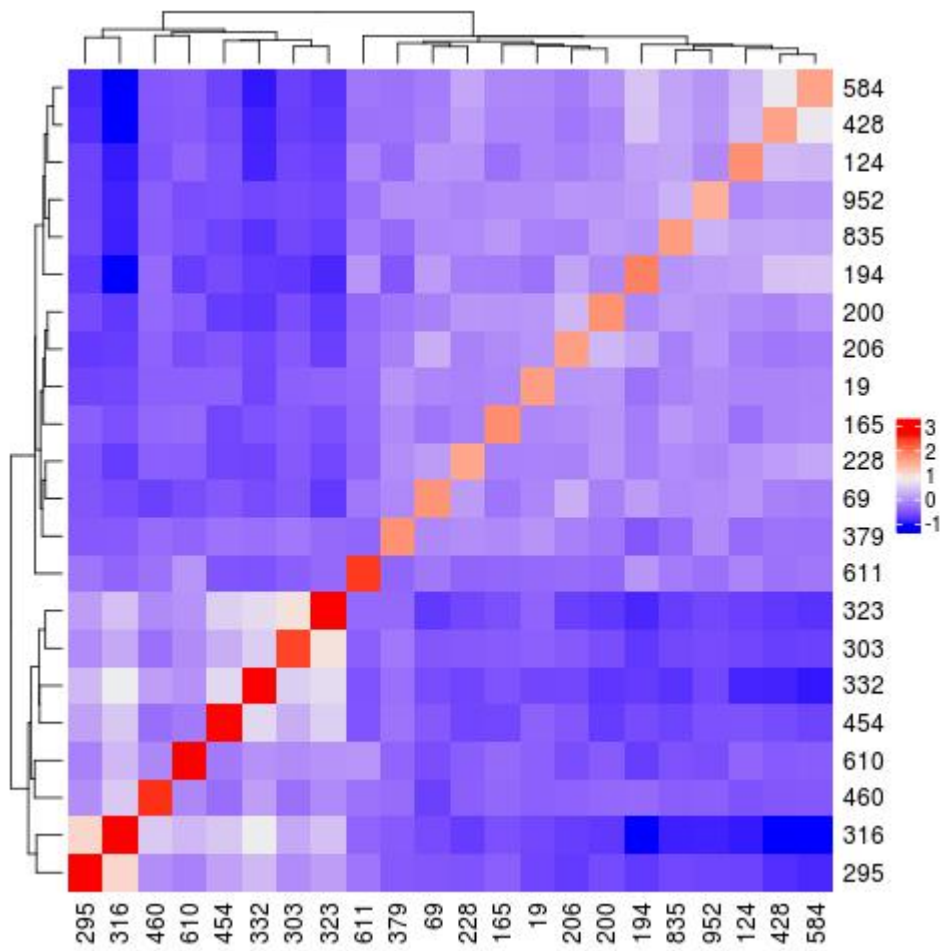

50

51 **Figure S12** Heatmap of genomic relationship among 22 oat lines used in this study

52 **Table S1** A comparison of BUSCOs plant gene completeness between the RTA in this study and  
53 the first version of *de novo* oat seed transcriptome assembly (*dnOST*, Gutierrez-Gonzalez et al.  
54 2013)

| BUSCO Statistics                | the RTA      | <i>dnOST</i> |
|---------------------------------|--------------|--------------|
| Complete BUSCOs                 | 1212 (84.2%) | 412 (28.7%)  |
| Complete and single-copy BUSCOs | 1188 (82.5%) | 116 (8.1%)   |
| Complete and duplicated BUSCOs  | 24 (1.7%)    | 296 (20.6%)  |
| Fragmented BUSCOs               | 148 (10.3%)  | 201 (14.0%)  |
| Missing BUSCOs                  | 80 (5.5%)    | 827 (57.3%)  |
| Total BUSCO groups searched     | 1440         | 1440         |

55

56

57 **Table S2** Chi-Square test for sub-cluster size distribution of the 22 temporal co-expression sets.  
 58 At significant level of 0.05, the critical p-value after Bonferroni correction is  $0.05/22=0.00227$ .  
 59

| Temporal co-expression set* | P-value     |
|-----------------------------|-------------|
| Top-8                       | 0.994548451 |
| Top-10                      | 0.999286221 |
| Top-12                      | 0.497109215 |
| Top-15                      | 0.003939038 |
| Top-13                      | 0.108831006 |
| Top-11                      | 0.344207141 |
| Top-9                       | 0.380203442 |
| Top-7                       | 0.608797221 |
| Top-3                       | 0.895528366 |
| Top-6                       | 0.419936316 |
| Top-5                       | 0.273601551 |
| Top-4                       | 0.594794097 |
| Top-31                      | 0.021221027 |
| Top-16                      | 0.133281338 |
| Top-1                       | 0.637929437 |
| Top-2                       | 0.83840654  |
| Top-24                      | 0.744979403 |
| Top-18                      | 0.210760149 |
| Top-19                      | 0.980442768 |
| Top-20                      | 0.35296887  |
| Top-14                      | 0.962213032 |
| Top-17                      | 0.549011073 |

60 \*The temporal co-expression sets were ordered the same as in Figure 4.

61 **Table S3** A list of oat transcripts homologous to biosynthetic genes of avenanthremides and fatty acids from other oat cultivars and  
 62 *Brachypodium distachyon*

| Genename                                  | Source       | Transcript name          | reference     | query_len <sup>a</sup> | ref_len <sup>b</sup> | aln_length <sup>c</sup> | pct_ident <sup>d</sup> |
|-------------------------------------------|--------------|--------------------------|---------------|------------------------|----------------------|-------------------------|------------------------|
| <b>Avenanthramides biosynthetic genes</b> |              |                          |               |                        |                      |                         |                        |
| CCoA3H                                    | Arabidopsis  | TRINITY_DN6473_c0_g1_i1  | NM_180006.2   | 1942                   | 1885                 | 1362                    | 67.621                 |
| CCoA3H                                    | Brachypodium | TRINITY_DN6473_c0_g1_i1  | KQK05634      | 1942                   | 2031                 | 1954                    | 86.131                 |
| CCoAOMT                                   | Oat          | TRINITY_DN3508_c0_g1_i7  | AB076979.1    | 1238                   | 622                  | 604                     | 99.834                 |
| HHT1                                      | Oat          | TRINITY_DN5172_c0_g1_i4  | AB076980.1    | 1598                   | 1755                 | 1343                    | 79.449                 |
| HHT2                                      | Oat          | TRINITY_DN5172_c0_g1_i4  | AB076981.1    | 1598                   | 1770                 | 1343                    | 78.555                 |
| HHT3                                      | Oat          | TRINITY_DN5172_c0_g1_i4  | AB076982.1    | 1598                   | 1659                 | 1343                    | 79.598                 |
| HHT4                                      | Oat          | TRINITY_DN5172_c0_g1_i4  | AB076983.1    | 1598                   | 1100                 | 1088                    | 97.151                 |
| <b>Fatty Acids biosynthetic genes</b>     |              |                          |               |                        |                      |                         |                        |
| ACCase                                    | Brachypodium | TRINITY_DN146_c0_g1_i8   | BRADI_5g03860 | 7812                   | 8783                 | 7598                    | 88.694                 |
| DGAT1/TAG1                                | Brachypodium | TRINITY_DN151_c0_g1_i4   | BRADI_1g37750 | 2878                   | 3009                 | 925                     | 72.757                 |
| FAB1/KAS2                                 | Brachypodium | TRINITY_DN207_c0_g1_i1   | BRADI_1g60300 | 2876                   | 2498                 | 1851                    | 87.088                 |
| FAB2                                      | Brachypodium | TRINITY_DN2740_c0_g1_i5  | BRADI_2g58930 | 5078                   | 1792                 | 1610                    | 86.957                 |
| FAD2                                      | Brachypodium | TRINITY_DN268_c0_g1_i4   | BRADI_3g53370 | 1883                   | 2351                 | 1665                    | 85.526                 |
| FAD3                                      | Brachypodium | TRINITY_DN10818_c0_g1_i3 | BRADI_1g65580 | 1198                   | 2817                 | 1195                    | 82.343                 |
| FAE1/KCS18                                | Brachypodium | TRINITY_DN1011_c0_g1_i5  | BRADI_2g16050 | 1990                   | 2481                 | 1447                    | 81.064                 |
| FATB                                      | Brachypodium | TRINITY_DN2629_c0_g1_i1  | BRADI_1g51170 | 2394                   | 4407                 | 1368                    | 88.085                 |
| GPAT9                                     | Brachypodium | TRINITY_DN5048_c0_g1_i7  | BRADI_1g25790 | 1490                   | 1540                 | 1460                    | 86.37                  |
| LPCAT1                                    | Brachypodium | TRINITY_DN3352_c0_g1_i1  | BRADI_3g51577 | 1846                   | 1671                 | 1634                    | 88.433                 |
| PAH1                                      | Brachypodium | TRINITY_DN1042_c0_g1_i6  | BRADI_2g23040 | 4252                   | 4162                 | 2485                    | 82.817                 |
| PDAT1                                     | Brachypodium | TRINITY_DN2921_c0_g1_i1  | BRADI_4g31540 | 2494                   | 2601                 | 2531                    | 86.448                 |
| WRI1                                      | Brachypodium | TRINITY_DN331_c0_g1_i1   | BRADI_4g43877 | 3900                   | 2035                 | 1223                    | 80.376                 |

63 <sup>a</sup>query\_len= query sequence length;

64 <sup>b</sup>ref\_len = reference sequence length;

65 <sup>c</sup>aln\_length= alignment length;

66 <sup>d</sup>pct\_ident= percent identity
